# Supplementary material for: Exogenous Melatonin Modulates Physiological Response to Nitrogen and Improves Yield in Nitrogen-Deficient Soybean (Glycine max L. Merr.)
Source: Frontiers journal article supplement (doi:10.3389/fpls.2022.865758), 2022-05-16
Supplement: Table_1.xls [file Table_1.xls]

## Sheet: Sheet1
Supplementary Table 1: Nutrient solution formula
	CK	0N	LN
Ca(NO3)2	0.328 g·L-1	0 g·L-1	0.033 g·L-1
KNO3	0.253 g·L-1	0 g·L-1	0.025 g·L-1
NH4Cl	0.535 g·L-1	0 g·L-1	0.054 g·L-1
CaCl2	0 g·L-1	0.222 g·L-1	0.200 g·L-1
KCl	0 g·L-1	0.186 g·L-1	0.168 g·L-1
MgSO4	0.120 g·L-1	0.120 g·L-1	0.120 g·L-1
KH2PO4	0.681 g·L-1	0.681 g·L-1	0.681 g·L-1
(1) Trace element solution	2.50 ml·L-1	2.50 ml·L-1	2.50 ml·L-1
(2) EDTA iron sodium salt solution	1.25 ml·L-1	1.25 ml·L-1	1.25 ml·L-1
(1) Trace element solution
KI	0.83 mg·L-1
H3BO3	6.20 mg·L-1
MnSO4	22.30 mg·L-1
ZnSO4	8.60 mg·L-1
Na2MoO4	0.25 mg·L-1
CuSO4	0.025 mg·L-1
(2) EDTA iron sodium salt solution
Na2EDTA	7.450 g·L-1
FeSO4·7H2O	5.570 g·L-1
